# Supplementary material
Source: PubMed Central journal article supplement (PMC10792992)
Supplement: NIHMS1955981-supplement-supplemental.pdf [file NIHMS1955981-supplement-supplemental.pdf]

# Supporting Information

## Probing the Cytotoxic Signaling Induced by Eupenifeldin in Ovarian Cancer Models

Amanda C. Maldonado<sup>1‡</sup>, Monica A. Haughan<sup>2‡</sup>, Manead Khin<sup>2</sup>, Julia Ekiert<sup>2</sup>, Ziwei Zhang<sup>2</sup>, Daniel Lantvit<sup>2</sup>, Zeinab Y. Al Subeh<sup>3</sup>, Herma C. Pierre<sup>4</sup>, Maryna Salkovski<sup>5</sup>, Tal Hirschhorn<sup>6</sup>, Yu (Tom) Gao<sup>2</sup>, Cedric J. Pearce<sup>7</sup>, Brent R. Stockwell<sup>6,8</sup>, Leslie N. Aldrich<sup>5</sup>, Nicholas H. Oberlies<sup>4</sup>, and Joanna E. Burdette<sup>2\*</sup>

<sup>1</sup>Chicago Biomedical Consortium, Northwestern University, Evanston, Illinois, United States

<sup>2</sup>Pharmaceutical Sciences, College of Pharmacy, University of Illinois at Chicago, Chicago, Illinois, United States

<sup>3</sup>Department of Medicinal Chemistry and Pharmacognosy, Jordan University of Science and Technology, Irbid, Jordan

<sup>4</sup>Department of Chemistry and Biochemistry, University of North Carolina at Greensboro, Greensboro, NC 27402, United States

<sup>5</sup>Department of Chemistry, College of Liberal Arts and Sciences, University of Illinois at Chicago, Chicago, Illinois, United States

<sup>6</sup>Department of Biological Sciences, Columbia University, New York, NY, 10027, United States

<sup>7</sup>Mycosynthetix Inc., Hillsborough, NC 27278, United States

<sup>8</sup>Department of Chemistry, Columbia University, New York, NY, 10027, United States

\*Corresponding author

‡Equal contribution

## TABLE OF CONTENTS

|                                                      |    |
|------------------------------------------------------|----|
| Supplement 1 Eupenifeldin Isolation Purity Data..... | 3  |
| Supplement 2 Hollow Fiber Assay Data.....            | 4  |
| Supplement 3 Annexin V vs PI.....                    | 5  |
| Supplement 4 PARP Western Blots.....                 | 6  |
| Supplement 5 Proteomic Analysis.....                 | 7  |
| Supplement 6 Ferroptosis Potentiation Assays.....    | 10 |

## SUPPLEMENT 1- Eupenifeldin Isolation Purity Data

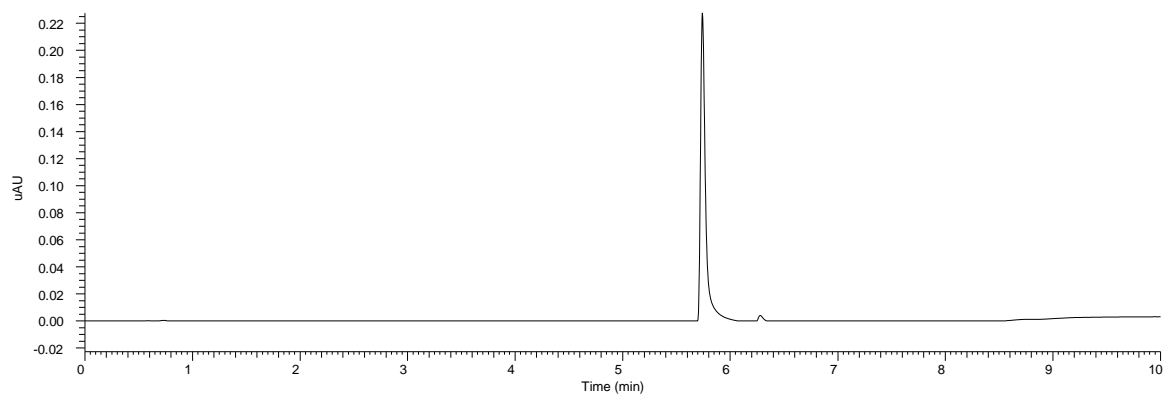

### S1.1 Isolated eupenifeldin HPLC Data

$^1\text{H}$  NMR Spectrum of Eupenifeldin (400 MHz,  $\text{CDCl}_3$ )

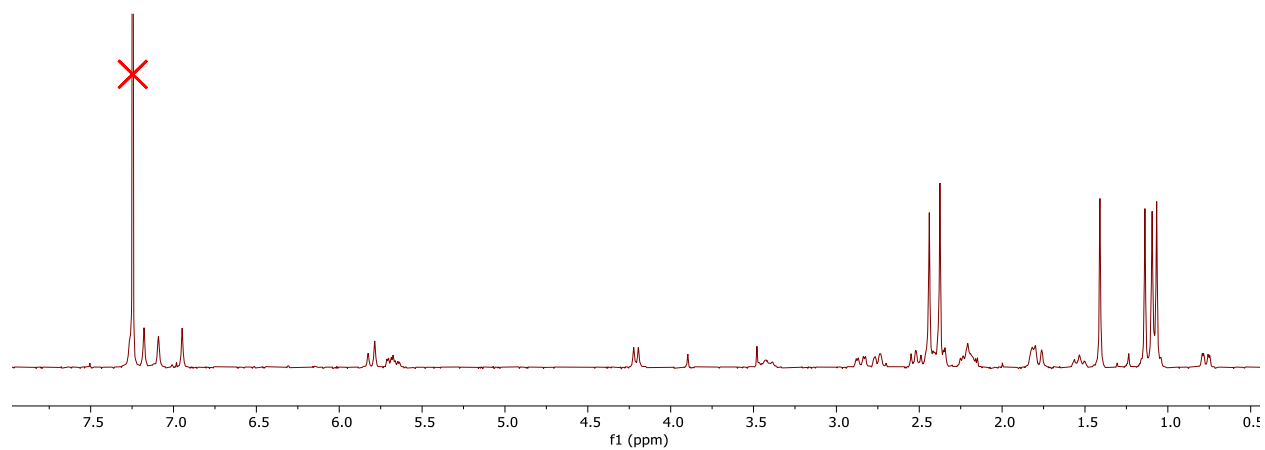

### S1.2 Isolated eupenifeldin NMR Data

SUPPLEMENTAL 2 – Additional Hollow Fiber Assay Data

| Treatment Group | Body Weight (g) |       |       |       |       |       | % Change |
|-----------------|-----------------|-------|-------|-------|-------|-------|----------|
|                 | Mouse ID number | Day 0 | Day 2 | Day 4 | Day 6 | Day 7 |          |
| Vehicle         | 101             | 23.5  | 22.2  | 22.4  | 21.8  | 21.8  | 7.23     |
|                 | 102             | 18.3  | 18.1  | 18.8  | 18.3  | 18.8  | 2.73     |
|                 | 103             | 20.9  | 20.2  | 20.2  | 20.1  | 20.0  | 4.31     |
|                 | 104             | 19.1  | 18.8  | 19.4  | 19.0  | 19.0  | 0.521    |
|                 | 105             | 19.1  | 19.3  | 19.8  | 19.6  | 19.4  | 1.57     |
|                 | 106             | 17.8  | 17.6  | 18.1  | 18.0  | 17.9  | 0.562    |
|                 | 107             | 16.9  | 16.8  | 16.9  | 16.6  | 16.8  | 0.592    |
|                 | 108             | 16.9  | 16.8  | 17.2  | 16.9  | 17.1  | 1.18     |

|                   |     |      |      |      |      |      |      |
|-------------------|-----|------|------|------|------|------|------|
| Taxol<br>2.8mg/kg | 109 | 19.6 | 19.6 | 19.2 | 16.3 | 16.8 | 14.3 |
|                   | 110 | 22.4 | 22.5 | 21.2 | 20   | 20.4 | 8.93 |
|                   | 111 | 19.8 | 19.5 | 18.9 | 16.4 | Died | 17.2 |
|                   | 112 | 20.1 | 19.6 | 20.5 | 17.3 | 17.1 | 14.9 |
|                   | 113 | 19.4 | 19.2 | 19.3 | 17.3 | Died | 10.8 |
|                   | 114 | 19.7 | 19.8 | 19.2 | 16.9 | 17.1 | 13.2 |
|                   | 115 | 20.0 | 19.8 | 19.1 | 17.4 | 19.1 | 4.50 |
|                   | 116 | 19.9 | 19.2 | 18.9 | 17.4 | 18.0 | 9.55 |

|                          |     |      |      |      |      |      |       |
|--------------------------|-----|------|------|------|------|------|-------|
| Eupenifeldin<br>0.5mg/kg | 117 | 17.4 | 17.7 | 17.6 | 16.6 | 16.1 | 7.47  |
|                          | 118 | 17.9 | 18.4 | 18.8 | 17.6 | 16.5 | 7.82  |
|                          | 119 | 16.0 | 16.7 | 16.0 | 14.9 | 14.1 | 11.88 |
|                          | 120 | 21.0 | 20.8 | 20.4 | 20.2 | 20.4 | 2.86  |
|                          | 121 | 17.6 | 18.1 | 17.3 | 16.5 | 16.1 | 8.52  |
|                          | 122 | 18.4 | 19.3 | 18.7 | 18.2 | 17.7 | 3.80  |
|                          | 123 | 19.5 | 20.3 | 20.2 | 19.3 | 18.8 | 3.59  |
|                          | 124 | 18.6 | 19.2 | 19.0 | 18.3 | 17.6 | 5.38  |

**S2.1** Mouse body weights and percent change over the course of treatment in the hollow fiber assay.

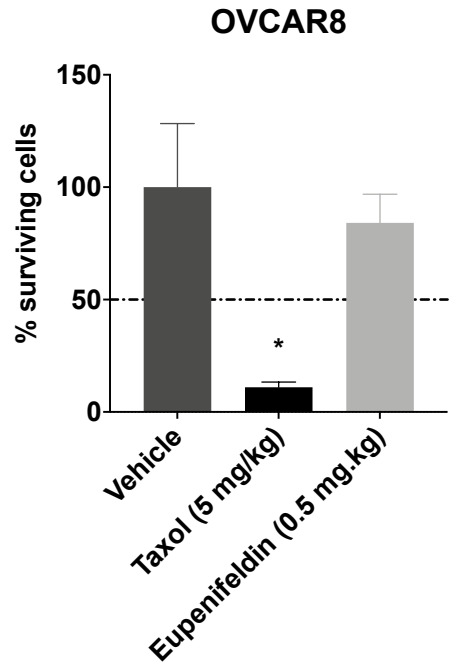

S2.2 Percent surviving OVCAR8 cells from the *in vivo* hollow fiber assay.

### SUPPLEMENTAL 3 Annexin V vs PI

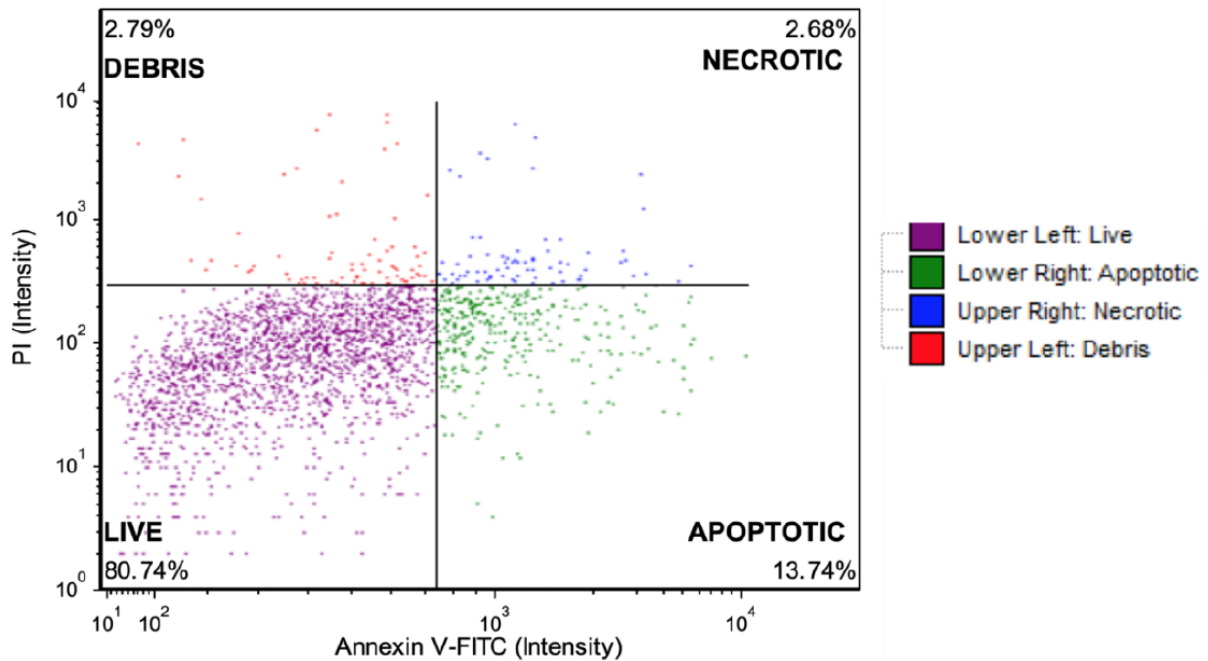

S3.1 Representative plot of DMSO Control.

SUPPLEMENTAL 4- Additional PARP Western Blots

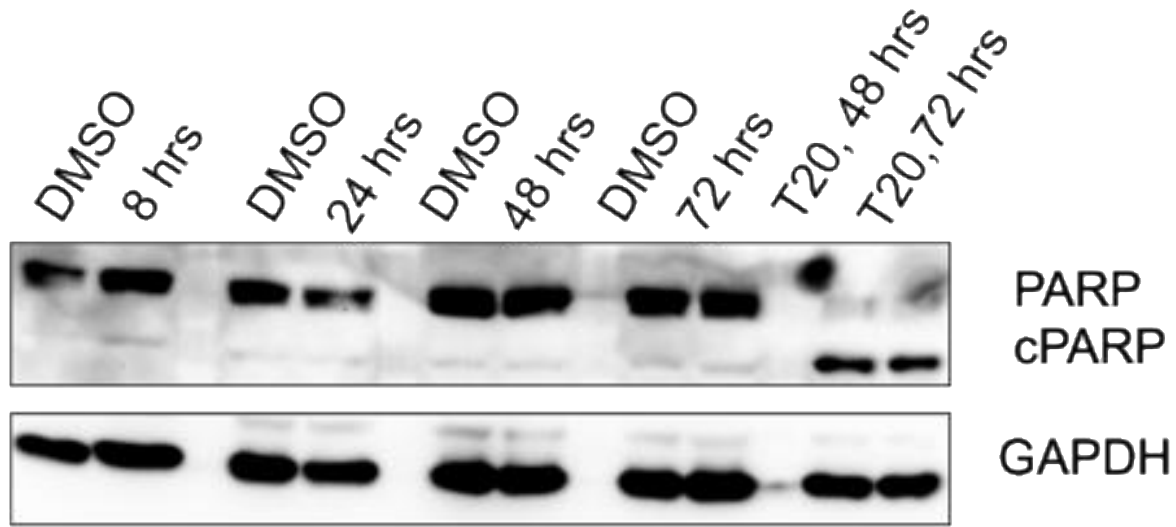

S4.1 Representative western blot of OVCAR8 25nM eupenifeldin treatment compared to 20nM Taxol (T20).

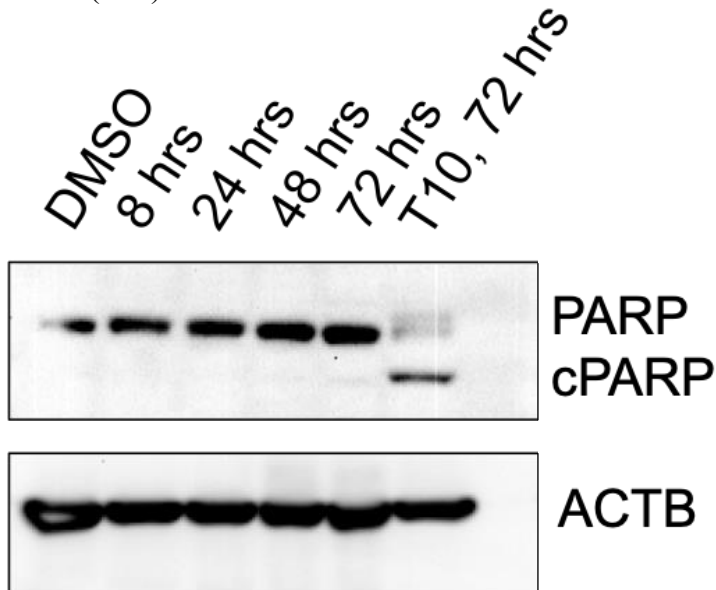

S4.2 Representative western blot of OVCAR5 25nM eupenifeldin treatment compared to 10nM Taxol (T10).

SUPPLEMENTAL 5 – Proteomic Analysis

| Upregulated Proteins |        | Downregulated Proteins |         |           |
|----------------------|--------|------------------------|---------|-----------|
|                      |        | POLR2H                 | SCO1    | TCOF1     |
| ASNS                 | TFRC   | ETFB                   | FAM136A | HEXB      |
| CD55                 | SLC3A2 | FTL                    | PPIF    | UQCRC2    |
| ATP6V0D1             | RAB2A  | RPL7                   | PPM1B   | ABHD10    |
| EIF2B1               | FARSB  | RPL11                  | ATP5MC1 | RPL34     |
| TMED2                | GNAS   | TOMM6                  | AK3     | COX5A     |
| ATP2B1               | EPHA2  | COX5B                  | PHB2    | ACO2      |
| WARS1                | EEF1G  | FKBP9                  | PHB     | HADHB     |
| AARS1                | SEC63  | RPS29                  | CTSB    | NDUFB10   |
| TMOD2                | KPNB1  | TUFM                   | SUCLA2  | SDHA      |
| GFPT1                | TARS1  | PRDX3                  | RPL31   | NDUFS1    |
| PHGDH                | UFL1   | IMMT                   | ATP5F1E | HIST1H2BO |
| CANX                 | KARS1  | OGDH                   | HINT2   | RPL37A    |
| ANXA5                | KNG1   | PFN2                   | ATP5F1D | ATP5IF1   |
| SARS1                | CD44   | RPL10                  | DLST    | ATP5PF    |
|                      |        | PDHA1                  | FAU     |           |

S5.1- List of All Upregulated and Downregulated Proteins

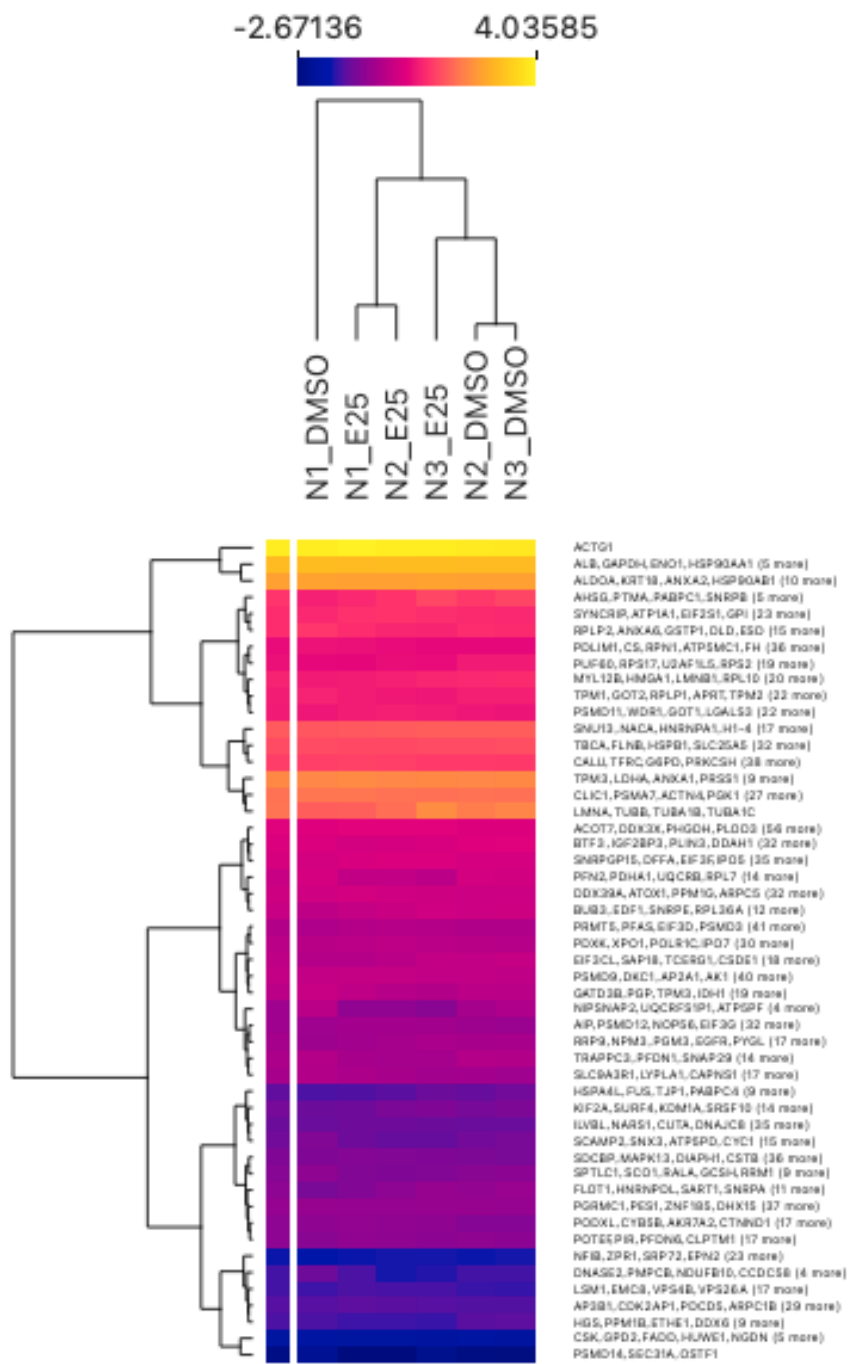

S5.2- Heatmap of log transformed spectral intensities of all differentially expressed proteins



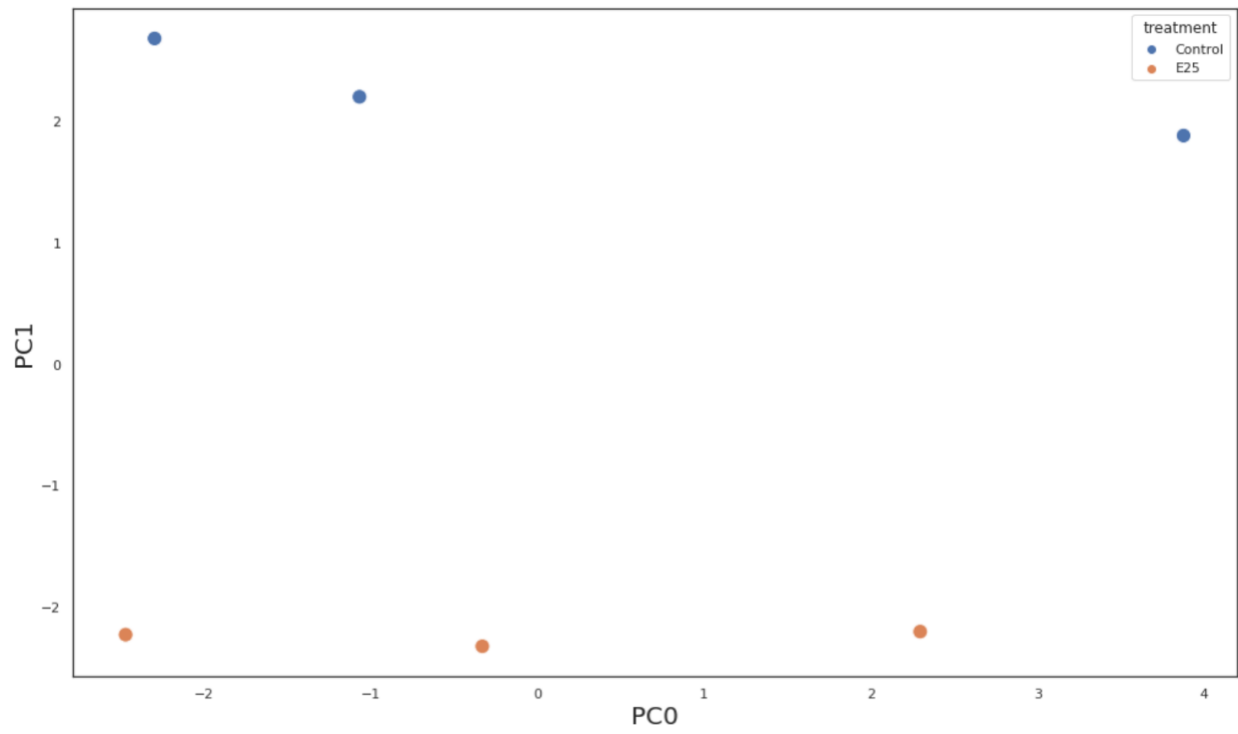

S5.3 Principle Component Analysis Plot

SUPPLEMENTAL 6 – Additional Ferroptosis Potentiation Assays

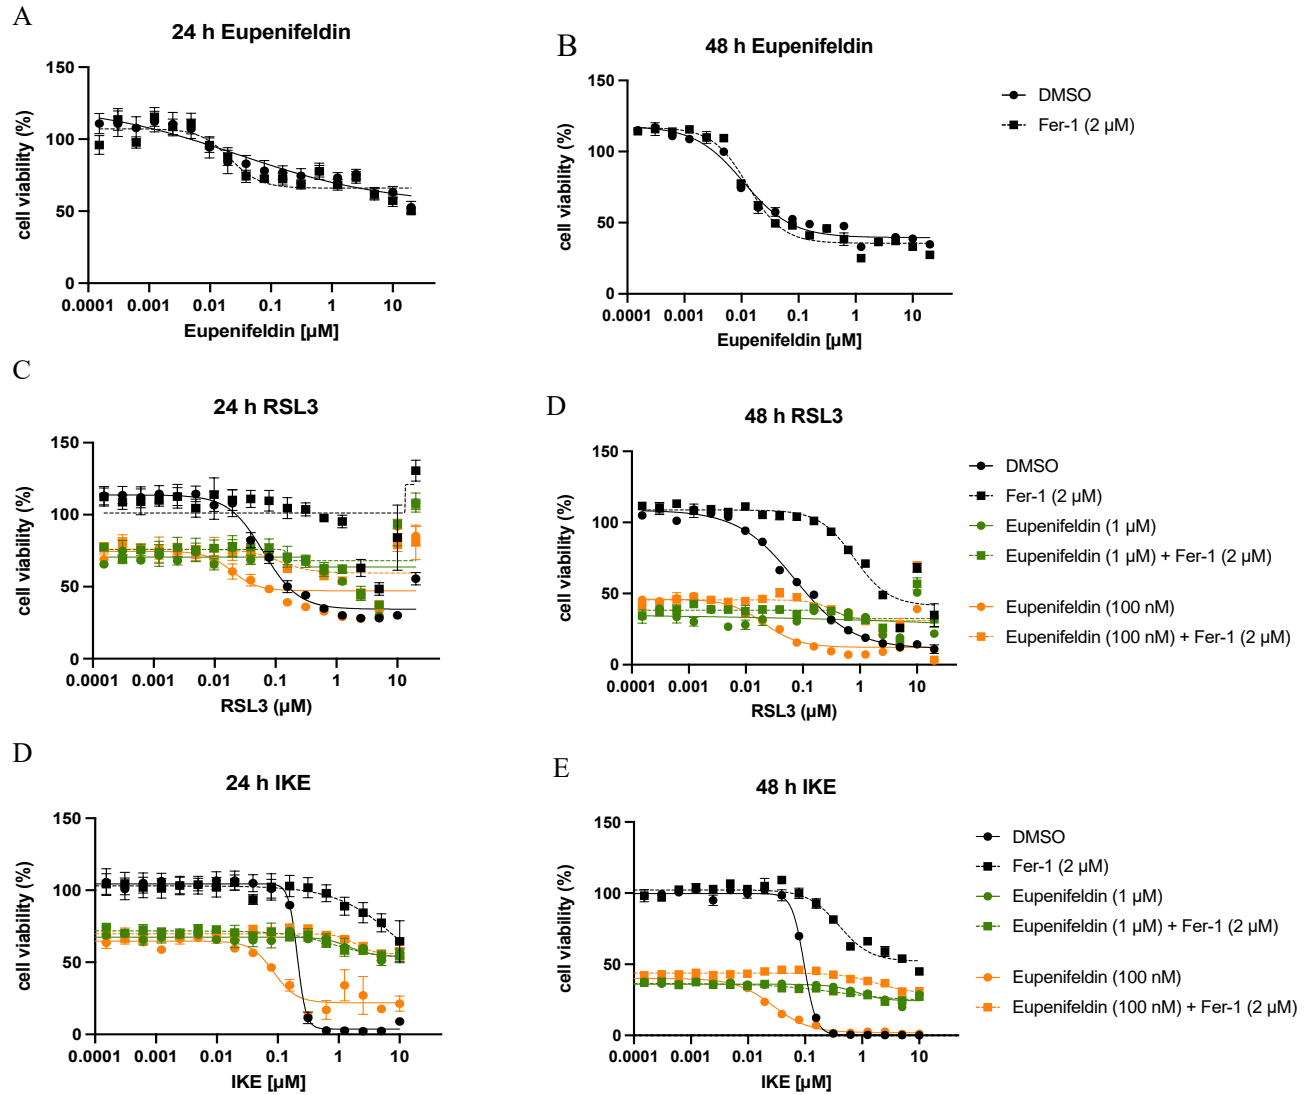

**S6.1** HT-1080 cells treated with (A,B) a ferroptosis inducer in a 2-fold dilution series, in the absence or presence of 1  $\mu$ M or 100 nM Eupenifeldin and (C-E) in combination with ferrostatin-1

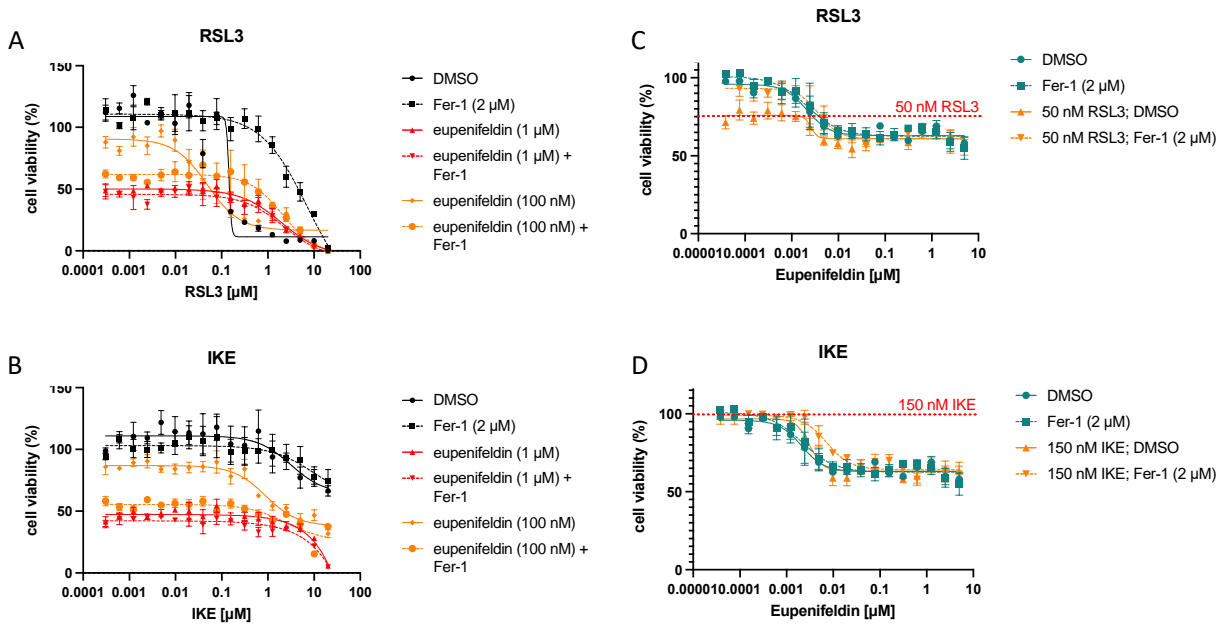

### S6.2 OVCAR3 potentiation by eupenifeldin for RSL3- or IKE-mediated ferroptosis

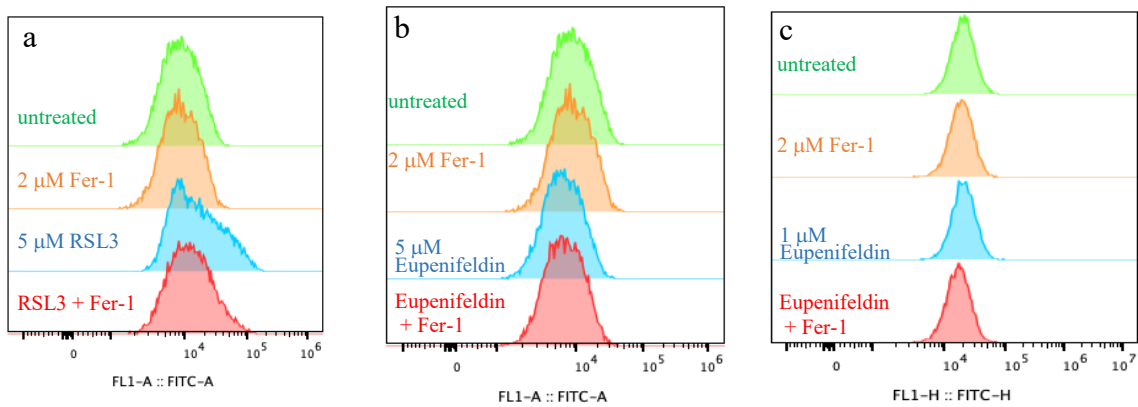

### S6.3 Lipid Peroxidation Measurements in OVCAR3. (A) 3hr RSL Treatments (B) 3hr Eupenifeldin Treatments (C) 6hr Eupenifeldin Treatments
